# Supplementary material
Source: publisher site journal article supplement (https://www.dovepress.com/article/supplementary_file/611737/611737%20Revised%20supplementary.docx)
Supplement: Supplementary file 1 [file 611737%20Revised%20supplementary.docx]

In our analysis, stepwise regression identified EMT as an independent risk factor for PAS, which appeared inconsistent with the initial PSM analysis using a 7 mm cutoff. We hypothesized that this discrepancy arose from the loss of numerical granularity when EMT was dichotomized.To test this, we reanalyzed the data using alternative cutoffs (6, 6.5, 7.5, and 8 mm; Supplementary Tables 1–7;Table 6). A significant difference in PAS incidence emerged only when 8 mm was used, both before and after PSM. (The 6 mm cutoff yielded a very small subgroup after matching, limiting interpretability.)

1.Baseline data of all patients after IVF/ICSI transfer before and after stratification matching based on an EMT of 6 mm

Before PSM，the distribution of baseline characteristics and transplantation variables between the two groups was slightly imbalanced. Compared with the patients in the EMT ≥ 6 mm group, those in the EMT < 6 mm group had a higher number of previous TCRA (2.27±1.22 vs. 1.68±1.01, P=0.03). After PSM, the baseline characteristics and transplantation variables of the two groups achieved balance, with no statistically significant differences observed in indicators such as the number of previous TCRA procedures (P > 0.05)(Supplementary Table 1)

**Supplementary Table 1.** Baseline data of all patients after IVF/ICSI transfer before and after stratification matching based on an EMT of 6 mm

| **Baseline data** | **Before PSM** | |  | **After PSM** | |  |
| --- | --- | --- | --- | --- | --- | --- |
| **EMT≥6mm**  **（447 cases）** | **EMT＜6mm**  **（15 cases）** | ***P*** | **EMT≥6mm**  **（30 cases）** | **EMT＜6mm**  **（15 cases）** | ***P*** |
| Age（±s） | 32.57±4.06 | 33.60±3.33 | 0.330 | 32.77±3.76 | 33.60±3.33 | 0.471 |
| AMH（ng/ml,±s） | 4.09±3.03 | 4.41±2.87 | 0.687 | 5.74±4.88 | 4.41±2.87 | 0.336 |
| BMI（kg/m2,±s） | 21.85±2.74 | 22.10±4.44 | 0.734 | 21.95±2.67 | 22.10±4.44 | 0.885 |
| Duration of infertility（years,±s） | 2.39±1.97 | 2.79±2.22 | 0.445 | 2.55±1.73 | 2.79±2.22 | 0.696 |
| Types of infertility |  |  | 0.583 |  |  | 0.721 |
| Primary | 53（11.9%） | 3（20.0%） |  | 9（30.0%） | 3（20.0%） |  |
| Secondary | 394（88.1%） | 12（80.0%） |  | 21（70.0%） | 12（80.0%） |  |
| Number of previous cesarean sections（No.,±s） | 0.08±0.28 | 0.00±0.00 | 0.275 | 0.00±0.00 | 0.00±0.00 | NaN |
| Number of previous vaginal deliveries（No.,±s） | 0.06±0.26 | 0.00±0.00 | 0.363 | 0.00±0.00 | 0.00±0.00 | NaN |
| Number of previous abortions（No.,±s） | 1.47±1.14 | 1.27±1.16 | 0.492 | 1.40±1.16 | 1.27±1.16 | 0.719 |
| History of previous uterine curettage |  |  | 0.650 |  |  | 1.000 |
| No | 83（18.6%） | 4（26.7%） |  | 8（26.7%） | 4（26.7%） |  |
| Yes | 364（81.4%） | 11（73.3%） |  | 22（73.3%） | 11（73.3%） |  |
| Number of previous uterine curettage（No.,±s） | 1.40±1.13 | 1.27±1.16 | 0.641 | 1.40±1.16 | 1.27±1.16 | 0.719 |
| Preoperative menstrual flow |  |  | 0.644 |  |  | 1.000 |
| Normal | 286（64.0%） | 8（53.3%） |  | 16（53.3%） | 8（53.3%） |  |
| Hypomenorrhea | 158（35.3%） | 7（46.7%） |  | 14（46.7%） | 7（46.7%） |  |
| Amenorrhea | 3（0.7%） | 0（0.0%） |  | 0（0.0%） | 0（0.0%） |  |
| Degree of IUA |  |  | 0.219 |  |  | 0.887 |
| Mild | 188（42.1%） | 3（20.0%） |  | 7（23.3%） | 3（20.0%） |  |
| Moderate | 230（51.5%） | 11（73.3%） |  | 20（66.7%） | 11（73.3%） |  |
| Severe | 29（6.4%） | 1（6.7%） |  | 3（10.0%） | 1（6.7%） |  |
| Number of previous TCRA（No.,±s） | 1.68±1.01 | 2.27±1.22 | 0.030 | 2.47±1.59 | 2.27±1.22 | 0.672 |
| Method of insemination |  |  | 1.000 |  |  | 0.721 |
| IVF | 300（67.1%） | 10（66.7%） |  | 23（76.7%） | 10（66.7%） |  |
| ICSI | 147（32.9%） | 5（33.3%） |  | 7（23.3%） | 5（33.3%） |  |
| ET/FET |  |  | 0.627 |  |  | 1.000 |
| FET | 338（75.6%） | 10（66.7%） |  | 20（66.7%） | 10（66.7%） |  |
| ET | 109（24.4%） | 5（33.3%） |  | 10（33.3%） | 5（33.3%） |  |
| Number of previous embryo transfers（No.,±s） | 1.93±1.58 | 1.67±0.82 | 0.525 | 1.73±1.08 | 1.67±0.82 | 0.834 |
| Number of high-quality embryo transferred（No.,±s） | 1.07±0.76 | 0.93±0.88 | 0.496 | 0.90±0.71 | 0.93±0.88 | 0.892 |
| Number of embryo transferred（No.,±s） | 1.79±0.50 | 1.87±0.35 | 0.567 | 1.87±0.51 | 1.87±0.35 | 1.000 |

*PSM*: Propensity Score Matching, *EMT*: Endometrial Thickness, *AMH*: Anti-Müllerian Hormone, *BMI*: Body Mass Index, *TCRA*: Transcervical Resection of Adhesions.

2.The outcomes of PAS in patients with EMT ≥ 6 mm and EMT < 6 mm before and after PSM

We separately compared the outcomes of PAS in patients with EMT ≥ 6 mm and those with EMT < 6 mm before and after PSM. The results showed that both before and after PSM, the incidence of PAS in the EMT < 6 mm group was higher than that in the EMT ≥ 6 mm group (26.7% vs. 18.3%, P = 0.633; 26.7% vs. 20.0%, P = 0.899), but the differences were not statistically significant (Supplementary Table 2).

**Supplementary Table 2.**PAS Outcomes After Embryo Transfer in IVF/ICSI Patients Stratified by an EMT Cut-off of 6 mm

| **Pregnancy outcomes** | **Before PSM** | | ***P*** | **After PSM** | | ***P*** |
| --- | --- | --- | --- | --- | --- | --- |
| **EMT≥6mm**  **（447 cases）** | **EMT＜6mm**  **（15 cases）** | **EMT≥6mm**  **（30 cases）** | **EMT＜6mm**  **（15 cases）** |
| PAS |  |  | 0.633 |  |  | 0.899 |
| No | 365（81.7%） | 11（73.3%） |  | 24（80.0%） | 11（73.3%） |  |
| Yes | 82（18.3%） | 4（26.7%） |  | 6（20.0%） | 4（26.7%） |  |

*PSM*: Propensity Score Matching; *EMT*: Endometrial Thickness

3.Baseline Data of Pregnant Patients After IVF/ICSI Embryo Transfer Stratified by an EMT Cut-off of 6.5 mm Before and After Matching

Before PSM, the distribution of baseline characteristics and transplantation variables was imbalanced between the two groups. Compared with patients in EMT ≥ 6.5 mm group, those in the EMT < 6.5 mm group had a higher proportion of hypomenorrhea and amenorrhea before surgery (48.1% vs. 34.9%, 3.7% vs. 0.5%, P = 0.040), a higher proportion of moderate and severe intrauterine adhesions (74.1% vs. 50.8%, 11.1% vs. 6.2%, P = 0.015), and a greater number of previous TCRA procedures (2.41 ± 1.08 vs. 1.66 ± 1.01, P < 0.001). After PSM, the baseline characteristics and transplantation variables of the two groups achieved balance. No statistically significant differences were observed in preoperative menstrual volume, the degree of intrauterine adhesions, the number of previous TCRA procedures, and other aspects (P > 0.05) (Supplementary Table 3).

**Supplementary Table 3.**Baseline Data of Pregnant Patients After IVF/ICSI Embryo Transfer Stratified by an EMT Cut-off of 6.5 mm Before and After Matching

| **Baseline** | **Before PSM** | |  | **After PSM** | |  |
| --- | --- | --- | --- | --- | --- | --- |
| **EMT≥6.5mm**  **（435 cases）** | **EMT＜6.5mm**  **（27 cases）** | ***P*** | **EMT≥6.5mm**  **（50 cases）** | **EMT＜6.5mm**  **（27 cases）** | ***P*** |
| Age（±s） | 32.51±4.07 | 34.04±3.13 | 0.057 | 34.68±3.91 | 34.04±3.13 | 0.465 |
| AMH（ng/ml,±s） | 4.09±3.05 | 4.30±2.75 | 0.721 | 4.01±2.75 | 4.30±2.75 | 0.661 |
| BMI（kg/m2,±s） | 21.86±2.75 | 21.82±3.63 | 0.944 | 22.22±2.73 | 21.82±3.63 | 0.590 |
| Duration of infertility（years,±s） | 2.38±1.92 | 2.79±2.73 | 0.291 | 2.38±1.96 | 2.79±2.73 | 0.449 |
| Types of infertility |  |  | 0.890 |  |  | 1.000 |
| Primary | 52（12.0%） | 4（14.8%） |  | 8（16.0%） | 4（14.8%） |  |
| Secondary | 383（88.0%） | 23（85.2%） |  | 42（84.0%） | 23（85.2%） |  |
| Number of previous cesarean sections（No.,±s） | 0.08±0.27 | 0.07±0.27 | 0.974 | 0.12±0.33 | 0.07±0.27 | 0.535 |
| Number of previous vaginal deliveries（No.,±s） | 0.06±0.25 | 0.11±0.32 | 0.265 | 0.12±0.39 | 0.11±0.32 | 0.919 |
| Number of previous abortions（No.,±s） | 1.45±1.10 | 1.70±1.59 | 0.262 | 1.82±1.21 | 1.70±1.59 | 0.720 |
| History of previous uterine curettage |  |  | 0.833 |  |  | 0.714 |
| No | 81（18.6%） | 6（22.2%） |  | 8（16.0%） | 6（22.2%） |  |
| Yes | 354（81.4%） | 21（77.8%） |  | 42（84.0%） | 21（77.8%） |  |
| Number of previous uterine curettage（No.,±s） | 1.38±1.10 | 1.67±1.49 | 0.207 | 1.82±1.26 | 1.67±1.49 | 0.634 |
| Preoperative menstrual flow |  |  | 0.040 |  |  | 0.941 |
| Normal | 281（64.6%） | 13（48.1%） |  | 22（44.0%） | 13（48.1%） |  |
| Hypomenorrhea | 152（34.9%） | 13（48.1%） |  | 26（52.0%） | 13（48.1%） |  |
| Amenorrhea | 2（0.5%） | 1（3.7%） |  | 2（4.0%） | 1（3.8%） |  |
| Degree of IUA |  |  | 0.015 |  |  | 0.493 |
| Mild | 187（43.0%） | 4（14.8%） |  | 7（14.0%） | 4（14.8%） |  |
| Moderate | 221（50.8%） | 20（74.1%） |  | 32（64.0%） | 20（74.1%） |  |
| Severe | 27（6.2%） | 3（11.1%） |  | 11（22.0%） | 3（11.1%） |  |
| Number of previous TCRA（No.,±s） | 1.66±1.01 | 2.41±1.08 | ＜0.001 | 2.22±1.04 | 2.41±1.08 | 0.458 |
| Method of insemination |  |  | 0.872 |  |  | 1.000 |
| IVF | 291（66.9%） | 19（70.4%） |  | 36（72.0%） | 19（70.4%） |  |
| ICSI | 144（33.1%） | 8（29.7%） |  | 14（28.0%） | 8（29.6%） |  |
| ET/FET |  |  | 0.593 |  |  | 0.791 |
| FET | 326（74.9%） | 22（81.5%） |  | 38（76.0%） | 22（81.5%） |  |
| ET | 109（25.1%） | 5（18.5%） |  | 12（24.0%） | 5（18.5%） |  |
| Number of previous embryo transfers（No.,±s） | 1.93±1.60 | 1.81±0.92 | 0.720 | 1.64±0.92 | 1.81±0.92 | 0.429 |
| Number of high-quality embryo transferred（No.,±s） | 1.07±0.76 | 0.96±0.81 | 0.473 | 0.96±0.75 | 0.96±0.81 | 0.987 |
| Number of embryo transferred（No.,±s） | 1.79±0.50 | 1.85±0.36 | 0.536 | 1.84±0.58 | 1.85±0.36 | 0.924 |

*PSM*: Propensity Score Matching; *EMT*: Endometrial Thickness; *AMH*: Anti-Müllerian Hormone; *BMI*: Body Mass Index; *TCRA*: Transcervical Resection of Adhesions

4.PAS Outcomes in Patients with EMT ≥ 6.5 mm and EMT < 6.5 mm Before and After PSM

We separately compared the PAS outcomes between the EMT ≥ 6.5 mm group and EMT < 6.5 mm group before and after PSM. The results showed that before PSM, the incidence of PAS in the EMT < 6.5 mm group was higher than that in the EMT ≥ 6.5 mm group (29.6% vs. 17.9%, P = 0.207), but the difference was not statistically significant. After PSM, the incidence of PAS in the EMT < 6.5 mm group was almost identical to that in the EMT ≥ 6.5 mm group (29.6% vs. 30%, P = 1.000). (Supplementary Table 4 )

**Supplementary Table 4.**PAS Outcomes after Embryo Transfer in IVF/ICSI Patients Stratified by an EMT of 6.5 mm

| **Pregnancy outcomes** | **Before PSM** | | ***P*** | **After PSM** | | ***P*** |
| --- | --- | --- | --- | --- | --- | --- |
| **EMT≥6.5mm**  **（435 cases）** | **EMT＜6.5mm**  **（27 cases）** | **EMT≥6.5mm**  **（50 cases）** | **EMT＜6.5mm**  **（27 cases）** |
| PAS |  |  | 0.207 |  |  | 1.000 |
| No | 357（82.1%） | 19（70.4%） |  | 35（70.0%） | 19（70.4%） |  |
| Yes | 78（17.9%） | 8（29.6%） |  | 15（30.0%） | 8（29.6%） |  |

*PSM* :Propensity Score Matching; *EMT:*Endometrial Thickness

5.Baseline Data of Pregnant IVF/ICSI Patients After Embryo Transfer Before and After Matching, Stratified by an EMT cut-off of 7.5 mm

Before PSM, the distribution of baseline characteristics and transplantation variables was imbalanced between the two groups. Compared with the patients in the EMT ≥ 7.5 mm group, those in the EMT < 7.5 mm group had a higher mean age (33.28 ± 3.89 vs. 32.39 ± 4.07, P = 0.046), a greater number of previous miscarriages (1.78 ± 1.28 vs. 1.37 ± 1.07, P = 0.001), more previous uterine curettages (1.75 ± 1.27 vs. 1.29 ± 1.06, P < 0.001), a higher proportion of hypomenorrhea and amenorrhea before surgery (48.1% vs. 31.9%, 1.0% vs. 0.6%, P = 0.007), a higher prevalence of moderate and severe intrauterine adhesions (68.5% vs. 47.2%, 11.1% vs. 5.1%, P < 0.001), a greater number of previous TCRAs (2.30 ± 1.21 vs. 1.52 ± 0.89, P < 0.001), and a higher rate of frozen embryo transfer (85.4% vs. 72.3%, P = 0.010).

After PSM, the baseline characteristics and transplantation variables achieved balance between the two groups. No statistically significant differences were observed in age, number of previous miscarriages, number of previous uterine curettages, preoperative menstrual flow, severity of intrauterine adhesions, rate of frozen embryo transfer, and other indicators (P > 0.05) (Supplementary Table 5).

**Supplementary Table 5.**Baseline Data of Pregnant IVF/ICSI Patients After Embryo Transfer Before and After Matching, Stratified by an EMT cut-off of 7.5 mm

| **Baseline** | **Before PSM** | |  | **After PSM** | |  |
| --- | --- | --- | --- | --- | --- | --- |
| **EMT≥7.5mm**  **（354 cases）** | **EMT＜7.5mm**  **（108 cases）** | ***P*** | **EMT≥7.5mm**  **（168 cases）** | **EMT＜7.5mm**  **（108 cases）** | ***P*** |
| Age（±s） | 32.39±4.07 | 33.28±3.89 | 0.046 | 33.11±4.04 | 33.28±3.89 | 0.738 |
| AMH（ng/ml,±s） | 4.02±3.00 | 4.38±3.12 | 0.275 | 4.36±3.33 | 4.38±3.12 | 0.954 |
| BMI（kg/m2,±s） | 21.86±2.79 | 21.85±2.88 | 0.978 | 21.59±2.43 | 21.85±2.88 | 0.410 |
| Duration（years,±s） | 2.47±2.01 | 2.19±1.87 | 0.195 | 2.28±1.79 | 2.19±1.87 | 0.690 |
| Type of infertility |  |  | 0.060 |  |  | 1.000 |
| Primary | 49（13.8%） | 7（6.5%） |  | 11（6.5%） | 7（6.5%） |  |
| Secondary | 305（86.2%） | 101（93.5%） |  | 157（93.5%） | 101（93.5%） |  |
| Number of previous cesarean sections（No.,±s） | 0.07±0.27 | 0.08±0.28 | 0.742 | 0.08±0.28 | 0.08±0.28 | 1.000 |
| Number of previous vaginal deliveries（No.,±s） | 0.06±0.26 | 0.05±0.21 | 0.569 | 0.06±0.26 | 0.05±0.21 | 0.659 |
| Number of previous abortions（No.,±s） | 1.37±1.07 | 1.78±1.28 | 0.001 | 1.62±1.07 | 1.78±1.28 | 0.268 |
| History of previous uterine curettage |  |  | 0.101 |  |  | 1.000 |
| No | 73（20.6%） | 14（13.0%） |  | 22（13.1%） | 14（13.0%） |  |
| Yes | 281（79.4%） | 94（87.0%） |  | 146（86.9%） | 94（87.0%） |  |
| Number of previous uterine curettage（No,±s） | 1.29±1.06 | 1.75±1.27 | ＜0.001 | 1.57±1.10 | 1.75±1.27 | 0.217 |
| Preoperative menstrual flow |  |  | 0.007 |  |  | 0.255 |
| Normal | 239（67.5%） | 55（50.9%） |  | 102（60.7%） | 55（50.9%） |  |
| Hypomenorrhea | 113（31.9%） | 52（48.1%） |  | 64（38.1%） | 52（48.1%） |  |
| Amenorrhea | 2（0.6%） | 1（1.0%） |  | 2（1.2%） | 1（0.9%） |  |
| Degree of IUA |  |  | ＜0.001 |  |  | 0.064 |
| Mild | 169（47.7%） | 22（20.4%） |  | 56（33.3%） | 22（20.4%） |  |
| Moderate | 167（47.2%） | 74（68.5%） |  | 95（56.5%） | 74（68.5%） |  |
| Severe | 18（5.1%） | 12（11.1%） |  | 17（10.1%） | 12（11.1%） |  |
| Number of previous TCRA（No.,±s） | 1.52±0.89 | 2.30±1.21 | ＜0.001 | 1.83±1.07 | 2.30±1.21 | 0.001 |
| Method of insemination |  |  | 0.035 |  |  | 0.494 |
| IVF | 228（64.4%） | 82（75.9%） |  | 120（71.4%） | 82（75.9%） |  |
| ICSI | 126（35.6%） | 26（24.1%） |  | 48（28.6%） | 26（24.1%） |  |
| ET/FET |  |  | 0.010 |  |  | 0.388 |
| FET | 256（72.3%） | 92（85.4%） |  | 135（80.4%） | 92（85.2%） |  |
| ET | 98（27.7%） | 16（14.8%） |  | 33（19.6%） | 16（14.8%） |  |
| Number of previous embryo transfer（No.,±s） | 1.92±1.67 | 1.93±1.19 | 0.964 | 1.99±2.07 | 1.93±1.19 | 0.777 |
| Number of high-quality embryo transferred（No.,±s） | 1.09±0.76 | 0.97±0.75 | 0.148 | 1.05±0.77 | 0.97±0.75 | 0.425 |
| Number of embryo transferred（No.,±s） | 1.81±0.49 | 1.76±0.53 | 0.401 | 1.79±0.50 | 1.76±0.53 | 0.607 |

*PSM* Propensity Score Matching; *EMT* Endometrial Thickness; *AMH* Anti-Müllerian Hormone; *BMI* Body Mass Index; *TCRA* Transcervical Resection of Adhesions

6.PAS Outcomes in Patients with EMT ≥ 7.5 mm and EMT < 7.5 mm Before and After PSM

We separately compared the PAS outcomes between the EMT ≥ 7.5 mm group and the EMT < 7.5 mm group before and after PSM. The results showed that both before and after PSM, the incidence of PAS in the EMT < 7.5 mm group was higher than that in the EMT ≥ 7.5 mm group (28.7% vs. 15.5%, P = 0.003; 28.7% vs. 18.5%, P = 0.065), with no statistically significant difference observed after matching (Supplementary Table 6 ).

**Supplementary Table 6.**PAS Outcomes after Embryo Transfer in IVF/ICSI Patients Stratified by an EMT cut-off of 7.5 mm

| **Pregnancy outcome** | **Before PSM** | | ***P*** | **After PSM** | | ***P*** |
| --- | --- | --- | --- | --- | --- | --- |
| **EMT≥7.5mm**  **（354 cases）** | **EMT＜7.5mm**  **（108 cases）** | **EMT≥7.5mm**  **（168 cases）** | **EMT＜7.5mm**  **（108 cases）** |
| PAS |  |  | 0.003 |  |  | 0.065 |
| No | 299（84.5%） | 77（71.3%） |  | 137（81.5%） | 77（71.3%） |  |
| Yes | 55（15.5%） | 31（28.7%） |  | 31（18.5%） | 31（28.7%） |  |

*PSM* Propensity Score Matching; *EMT* Endometrial Thickness

7.Baseline Data of Pregnant IVF/ICSI Patients After Embryo Transfer Before and After Matching, Stratified by an EMT cut-off of 8 mm

Before PSM, the distributions of baseline characteristics and transplantation variables were imbalanced between the two groups. Compared with patients in the EMT ≥ 8 mm group, those in the EMT < 8 mm group had a significantly older age (33.10 ± 3.99 vs. 32.30 ± 4.05, P = 0.039), a higher number of previous miscarriages (1.68 ± 1.23 vs. 1.33 ± 1.06, P = 0.001), a higher proportion of patients with a history of previous uterine curettage (87.4% vs. 77.4%, P = 0.012), a higher number of previous uterine curettages (1.66 ± 1.22 vs. 1.25 ± 1.04, P < 0.001), a higher proportion of patients with hypomenorrhea before surgery (46% vs. 29.5%, P = 0.002), a higher proportion of moderate and severe intrauterine adhesions (64.4% vs. 44.8% and 8.6% vs. 5.2%, respectively, P = 0.001), a higher number of previous TCRA procedures (2.12 ± 1.20 vs. 1.45 ± 0.81, P < 0.001), and a higher proportion of frozen embryo transfer (86.8% vs. 68.4%, P < 0.001).

After PSM, the baseline characteristics and transplantation variables were well-balanced between the two groups, with no statistically significant differences in age, number of previous miscarriages, history of previous uterine curettage, number of previous uterine curettages, preoperative menstrual volume, and severity of intrauterine adhesions (P > 0.05) ( Supplementary Table 7 )

**Supplementary Table 7.**Baseline Data of Pregnant Patients After IVF/ICSI Embryo Transfer Stratified by an EMT cut-off of 8 mm Before and After Matching

| **Baseline** | **Before PSM** | |  | **After PSM** | |  |
| --- | --- | --- | --- | --- | --- | --- |
| **EMT≥8mm**  **（288 cases）** | **EMT＜8mm**  **（174 cases）** | ***P*** | **EMT≥8mm**  **（136 cases）** | **EMT＜8mm**  **（174 cases）** | ***P*** |
| Age（±s） | 32.30±4.05 | 33.10±3.99 | 0.039 | 32.68±4.10 | 33.10±3.99 | 0.351 |
| AMH（ng/ml,±s） | 4.07±3.13 | 4.15±2.85 | 0.794 | 4.17±3.49 | 4.15±2.85 | 0.944 |
| BMI（kg/m2,±s） | 21.85±2.78 | 21.88±2.86 | 0.918 | 21.65±2.75 | 21.88±2.86 | 0.466 |
| Duration（years,±s） | 2.41±1.86 | 2.39±2.17 | 0.884 | 2.36±1.95 | 2.39±2.17 | 0.926 |
| Types of infertility |  |  | 0.291 |  |  | 1.000 |
| Primary | 39（13.5%） | 17（9.8%） |  | 15（10.1%） | 17（9.8%） |  |
| Secondary | 249（86.5%） | 157（90.2%） |  | 133（89.9%） | 157（90.2%） |  |
| Number of previous cesarean sections（No.,±s） | 0.08±0.28 | 0.07±0.25 | 0.678 | 0.07±0.26 | 0.07±0.25 | 0.853 |
| Number of previous abortions（No.,±s） | 0.06±0.26 | 0.05±0.25 | 0.657 | 0.05±0.23 | 0.05±0.25 | 0.930 |
| Number of previous abortions（No.,±s） | 1.33±1.06 | 1.68±1.23 | 0.001 | 1.56±1.10 | 1.68±1.23 | 0.349 |
| History of previous uterine curettage |  |  | 0.012 |  |  | 0.558 |
| No | 65（22.6%） | 22（12.6%） |  | 23（15.5%） | 22（12.6%） |  |
| Yes | 223（77.4%） | 152（87.4%） |  | 125（84.5%） | 152（87.4%） |  |
| Number of previous uterine curettage（No.,±s） | 1.25±1.04 | 1.66±1.22 | ＜0.001 | 1.51±1.08 | 1.66±1.22 | 0.252 |
| Preoperative menstrual flow |  |  | 0.002 |  |  | 0.074 |
| Normal | 201（69.8%） | 93（53.4%） |  | 96（64.9%） | 93（53.4%） |  |
| Hypomenorrhea | 85（29.5%） | 80（46.0%） |  | 50（33.8%） | 80（46.0%） |  |
| Amenorrhea | 2（0.7%） | 1（0.6%） |  | 2（1.4%） | 1（0.6%） |  |
| Degree of IUA |  |  | ＜0.001 |  |  | 0.102 |
| Mild | 144（50.0%） | 47（27.0%） |  | 56（37.8%） | 47（27.0%） |  |
| Moderate | 129（44.8%） | 112（64.4%） |  | 79（53.4%） | 112（64.4%） |  |
| Severe | 15（5.2%） | 15（8.6%） |  | 13（8.8%） | 15（8.6%） |  |
| Number of previous TCRA（No.,±s） | 1.45±0.81 | 2.12±1.20 | ＜0.001 | 1.65±0.94 | 2.12±1.20 | ＜0.001 |
| Method of insemination |  |  | 0.168 |  |  | 0.393 |
| IVF | 186（64.6%） | 124（71.3%） |  | 98（66.2%） | 124（71.3%） |  |
| ICSI | 102（35.4%） | 50（28.7%） |  | 50（33.8%） | 50（28.7%） |  |
| ET/FET |  |  | ＜0.001 |  |  | 0.046 |
| FET | 197（68.4%） | 151（86.8%） |  | 115（77.7%） | 151（86.8%） |  |
| ET | 91（31.6%） | 23（13.2%） |  | 33（22.3%） | 23（13.2%） |  |
| Number of previous embryo transfer（No.,±s） | 1.91±1.76 | 1.94±1.18 | 0.857 | 1.74±1.14 | 1.94±1.18 | 0.138 |
| Number of high-quality embryo（No.,±s） | 1.12±0.76 | 0.98±0.76 | 0.053 | 1.02±0.77 | 0.98±0.76 | 0.613 |
| Number of embryo transferred（No.,±s） | 1.80±0.47 | 1.79±0.54 | 0.966 | 1.80±0.46 | 1.79±0.54 | 0.847 |

*PSM* Propensity Score Matching; *EMT* Endometrial Thickness; *AMH* Anti-Müllerian Hormone; *BMI* Body Mass Index; *TCRA* Transcervical Resection of Adhesions.

**Supplementary figure 1** Nomogram


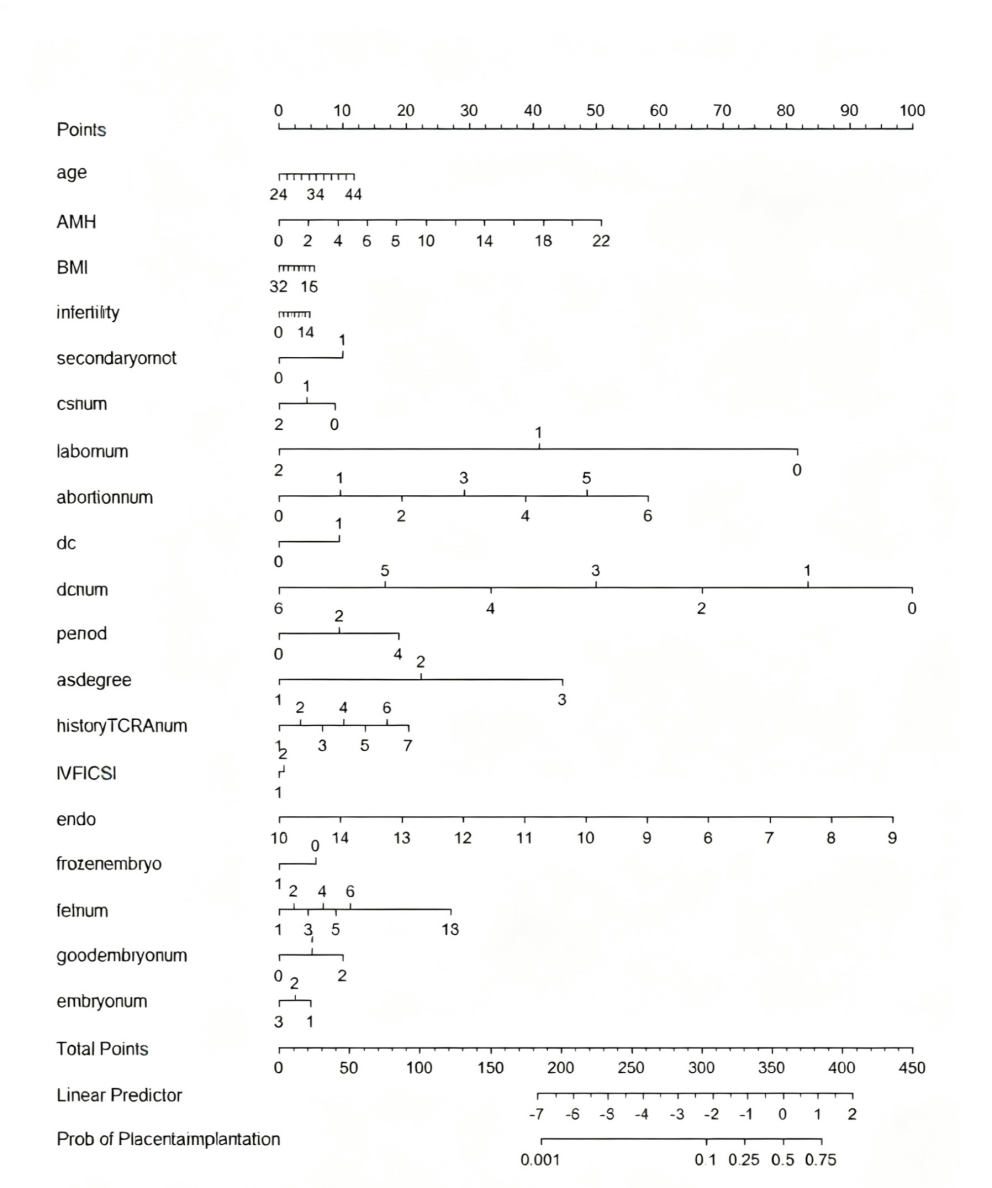


Supplementary figure 1 is a nomogram for evaluating various risk factors for the occurrence of PAS. Locate the position of each variable on its corresponding axis, draw a line to the points axis, sum up the points for all variables, and then draw a line from the total points axis to determine the probability of PAS occurrence at the bottom of the nomogram.

Abbreviations:Age: age, AMH: anti-Müllerian hormone, BMI: body mass index, infertility: duration of infertility, secondary or not: type of infertility (primary or secondary), cs num: number of previous cesarean sections, labor num: number of previous vaginal deliveries, abortion num: number of previous abortions, dc: history of previous uterine curettage (yes or no), dc num: number of previous uterine curettages, period: preoperative menstrual flow, as degree: severity of intrauterine adhesion, history TCRA num: number of previous TCRA procedures, IVF/ICSI: insemination method (IVF/ICSI), endo: endometrial thickness on the day of embryo transfer, frozen embryo: type of transferred embryo (fresh or frozen), fet num: number of previous embryo transfers, good embryo num: number of high-quality embryos transferred, embryo num: number of embryos transferred.

**Supplementary figure 2** Matching - process Diagram


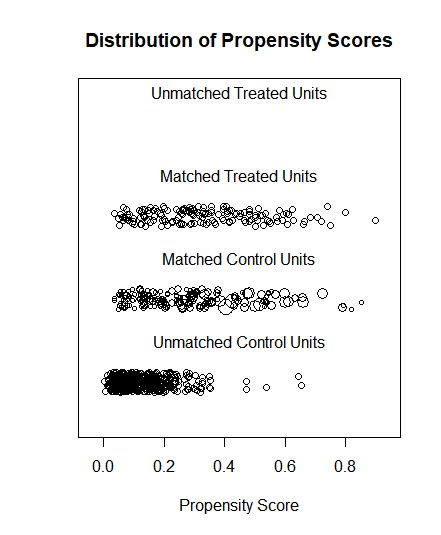

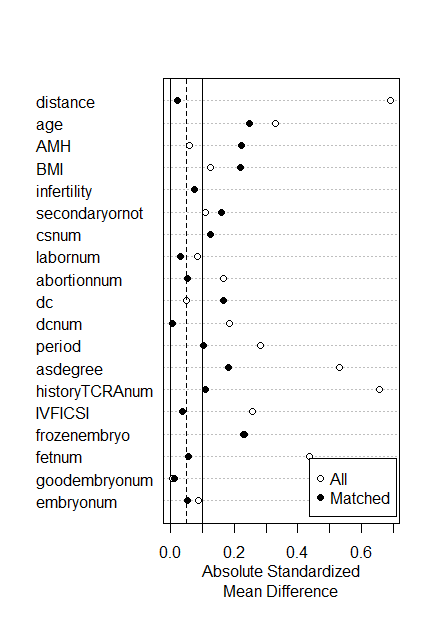

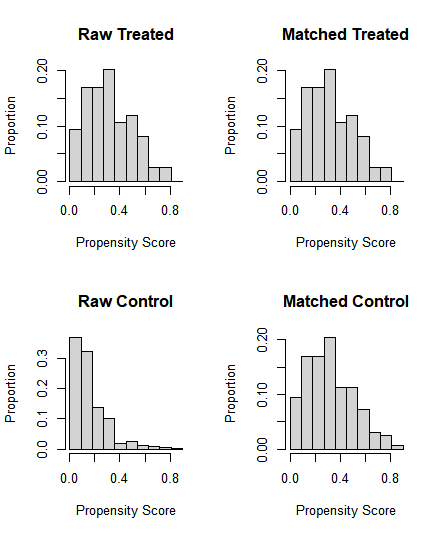


Supplementary figure 2 is a propensity score matching process diagram of baseline data for all patients after IVF/ICSI transfer, stratified by an endometrial thickness of 7 mm

**Supplementary figure 3** Statistical results of multicollinearity assessed by VIF

**
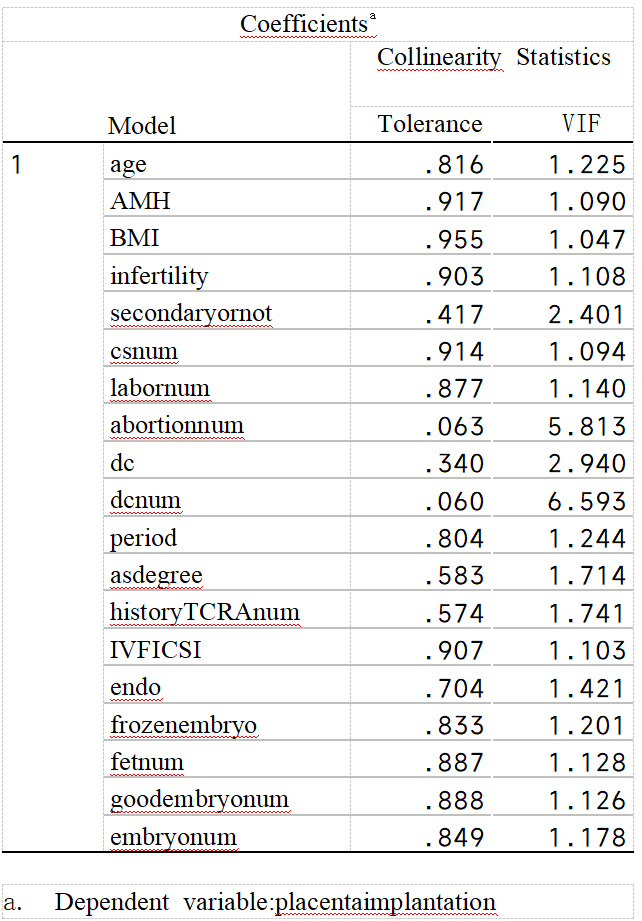
**

Abbreviations:age: age, AMH: anti-Müllerian hormone, BMI: body mass index, infertility: duration of infertility, secondary or not: type of infertility (primary or secondary), cs num: number of previous cesarean sections, labor num: number of previous vaginal deliveries, abortion num: number of previous abortions, dc: history of previous uterine curettage (yes or no), dc num: number of previous uterine curettages, period: preoperative menstrual flow, as degree: severity of intrauterine adhesion, history TCRA num: number of previous TCRA procedures, IVF/ICSI: insemination method (IVF/ICSI), endo: endometrial thickness on the day of embryo transfer, frozen embryo: type of transferred embryo (fresh or frozen), fet num: number of previous embryo transfers, good embryo num: number of high-quality embryos transferred, embryo num: number of embryos transferred.
